# Supplementary material
Source: ML conference proceedings conference paper supplement (https://openreview.net/forum?id=mImUMLEpdf)

Original

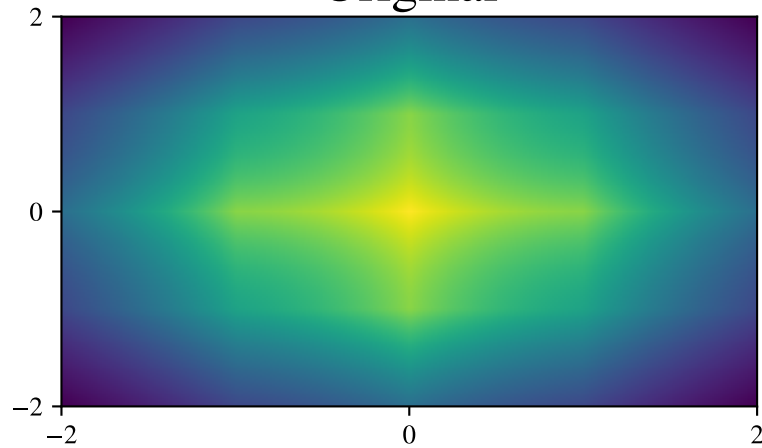

Global Pure

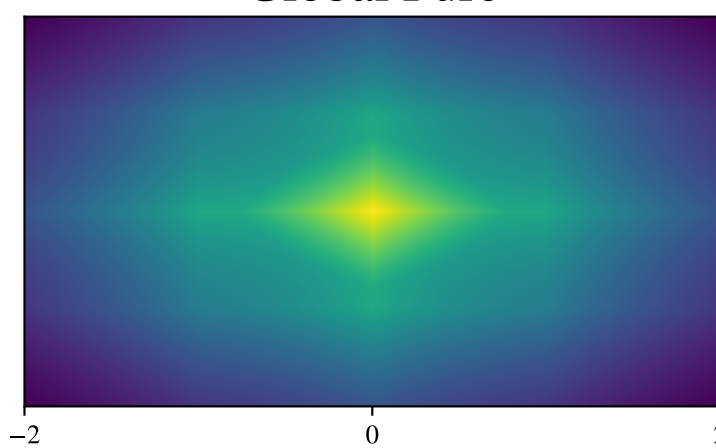

Local Pure

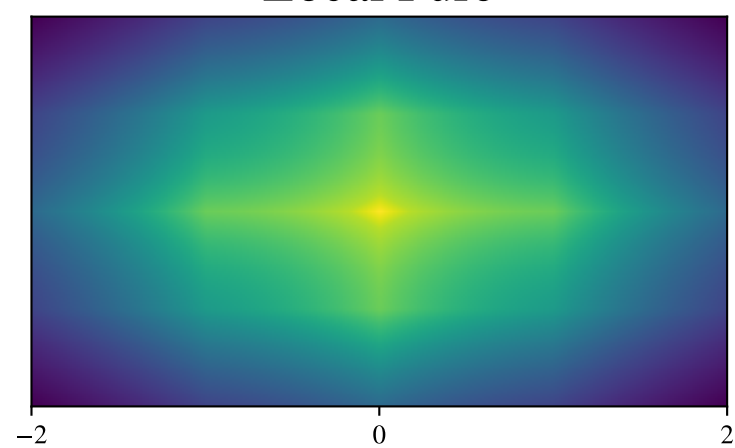

Original

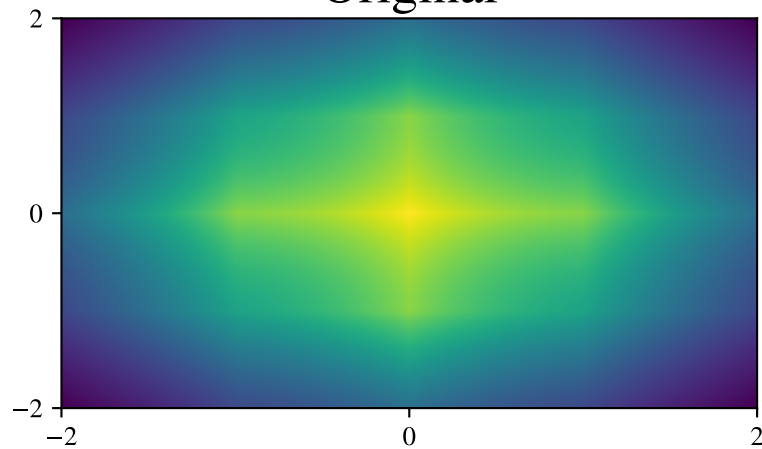

Global GLDP

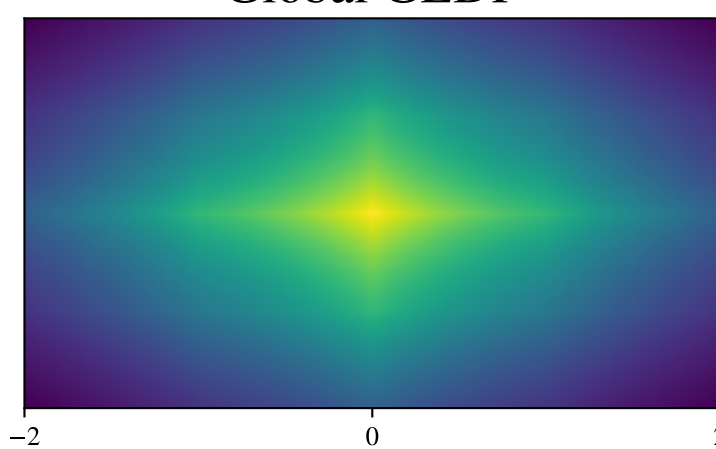

Local GLDP

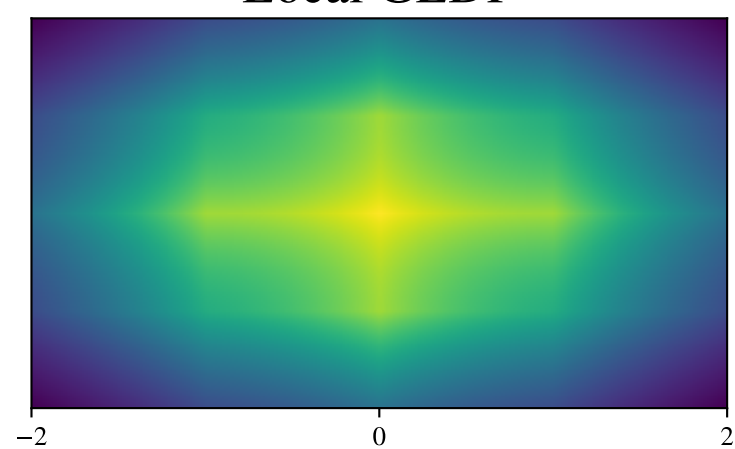

Supplement: supplementary_material [file LaplaceMixture_2x3Comparison.pdf › figures/LaplaceMixture_2x3Comparison.pdf]

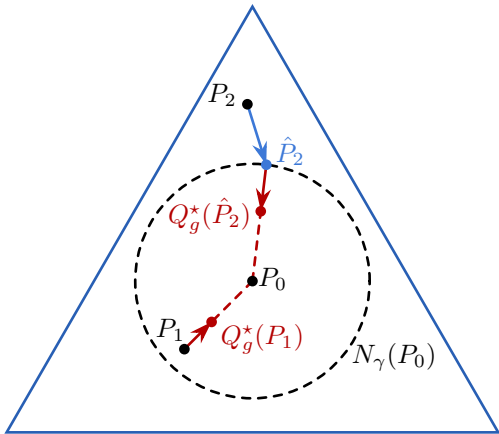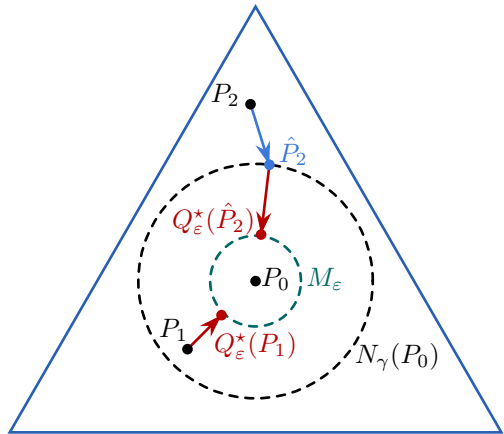

Supplement: supplementary_material [file Theorems_Visualization.pdf › figures/Theorems_Visualization.pdf]

KL

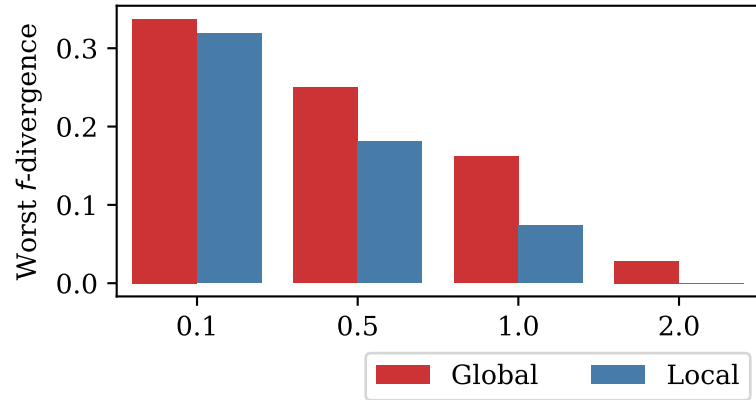

TV

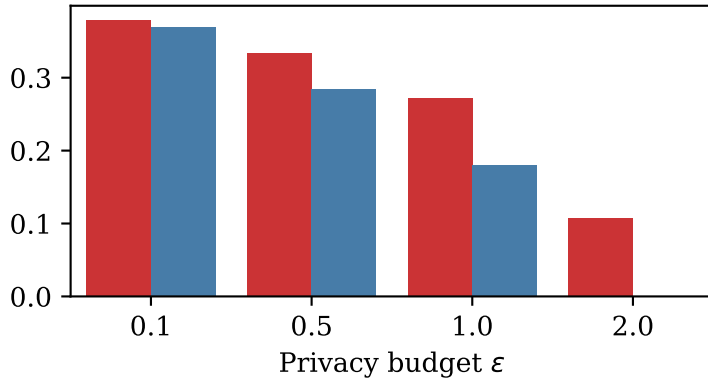

Sq. Hel

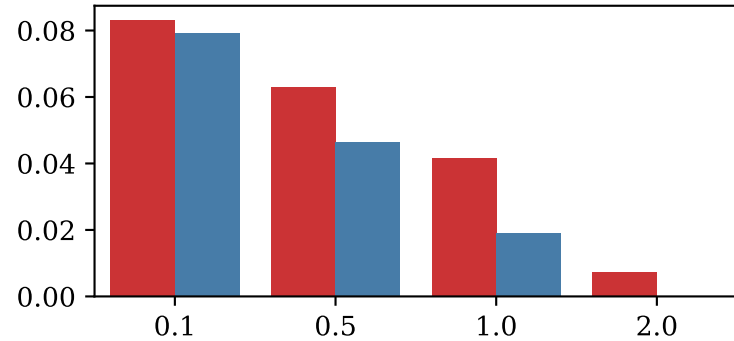

Supplement: supplementary_material [file result_1DLaplaceMix.pdf › figures/result_1DLaplaceMix.pdf]

KL

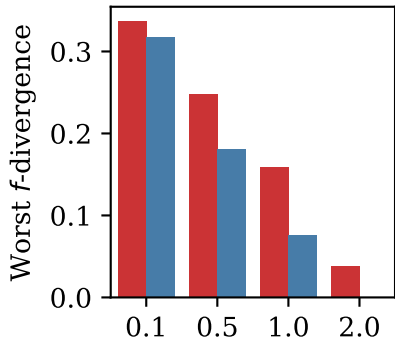

TV

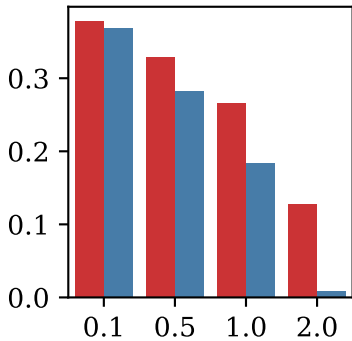

Sq. Hel

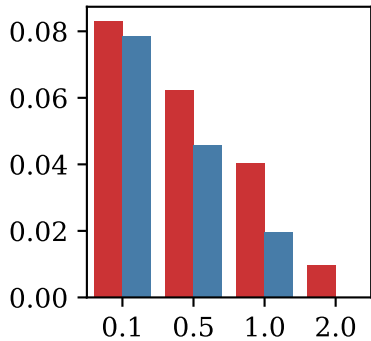

Global Local

Privacy parameter  $\nu$

Supplement: supplementary_material [file result_1DLaplaceMix_GLDP.pdf › figures/result_1DLaplaceMix_GLDP.pdf]

KL

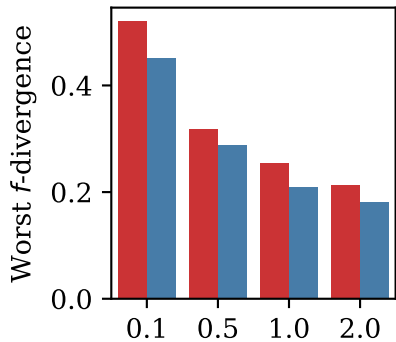

TV

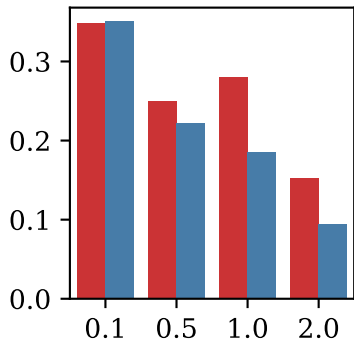

Sq. Hel

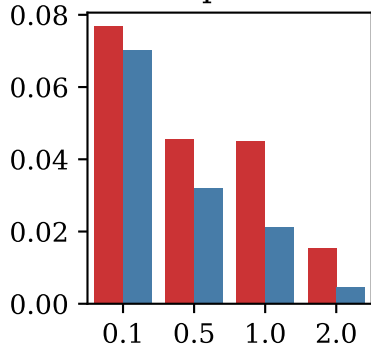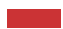

Global

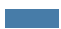

Local

Privacy budget  $\epsilon$

Supplement: supplementary_material [file result_2DLaplaceMix.pdf › figures/result_2DLaplaceMix.pdf]

KL

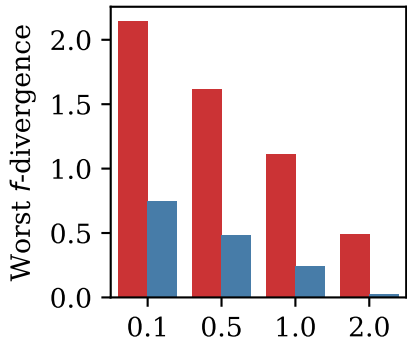

TV

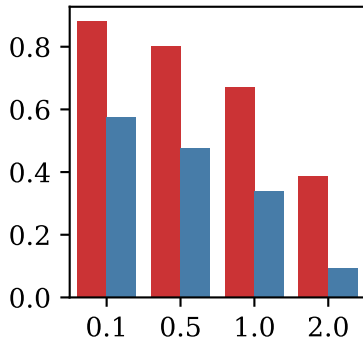

Sq. Hel

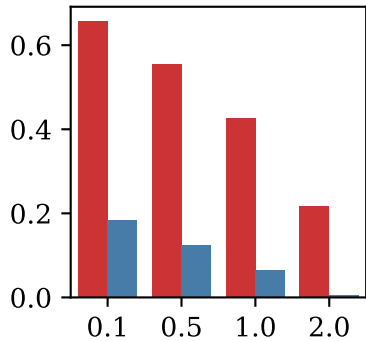

Global Local

Privacy budget  $\nu$

Supplement: supplementary_material [file result_finite_GDP_k10.pdf › figures/result_finite_GDP_k10.pdf]

KL

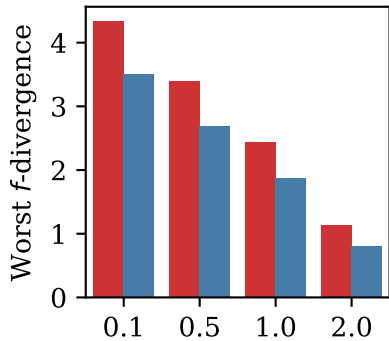

TV

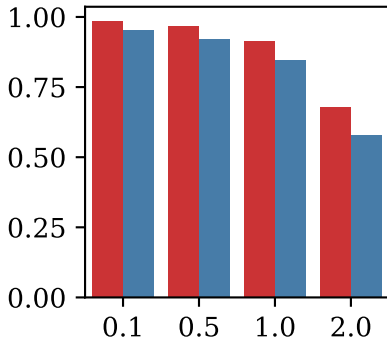

Sq. Hel

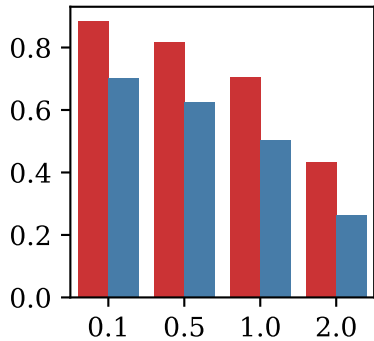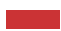

Global

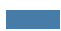

Local

Privacy budget  $\nu$

Supplement: supplementary_material [file result_finite_GDP_k100.pdf › figures/result_finite_GDP_k100.pdf]

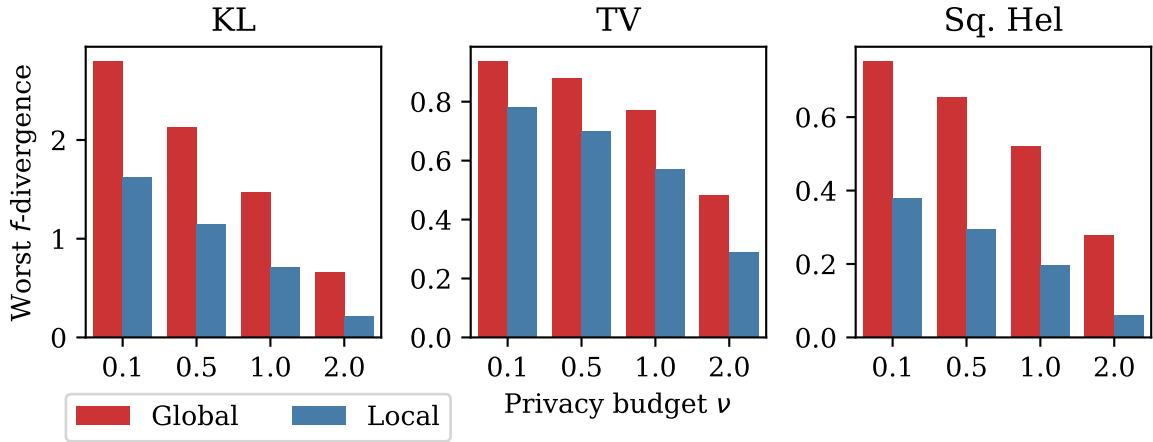

Supplement: supplementary_material [file result_finite_GDP_k20.pdf › figures/result_finite_GDP_k20.pdf]

KL

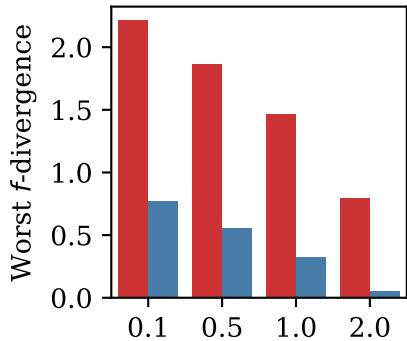

TV

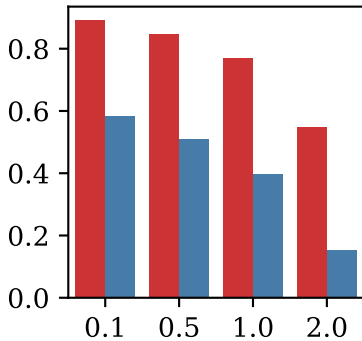

Sq. Hel

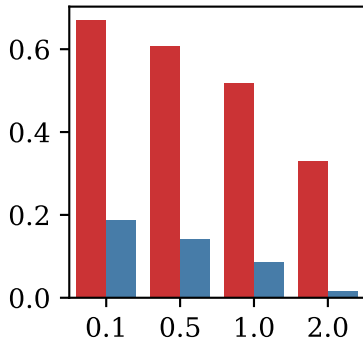

Global



Local

Privacy budget  $\epsilon$

Supplement: supplementary_material [file result_finite_k10.pdf › figures/result_finite_k10.pdf]

KL

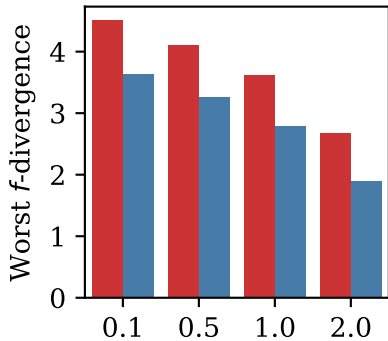

TV

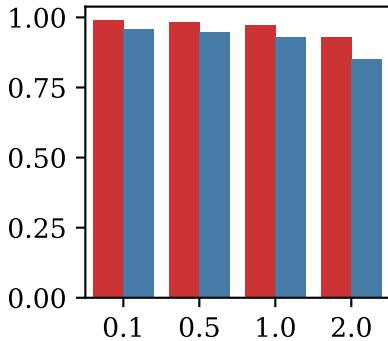

Sq. Hel

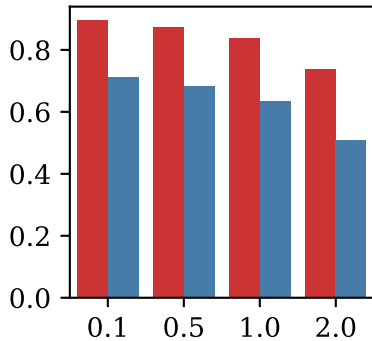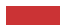

Global

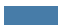

Local

Privacy budget  $\epsilon$

Supplement: supplementary_material [file result_finite_k100.pdf › figures/result_finite_k100.pdf]

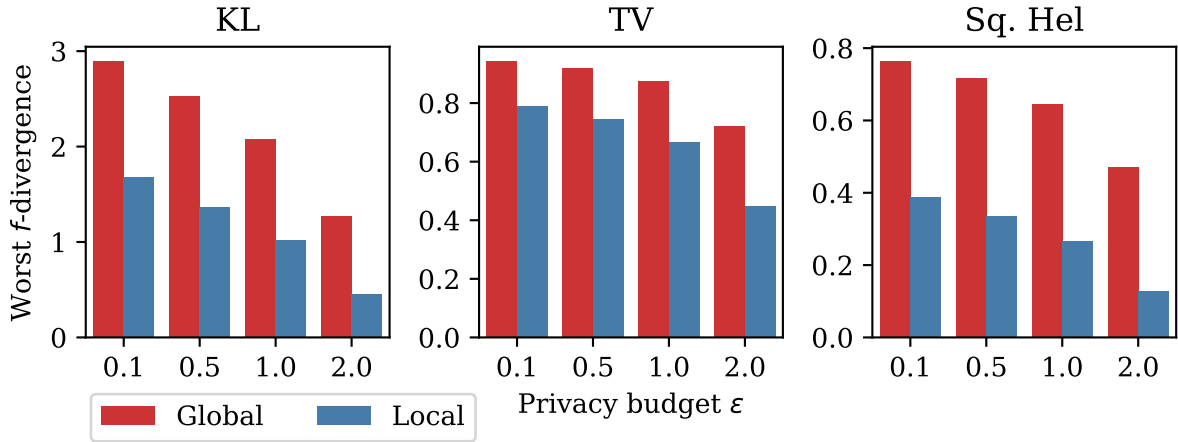

Supplement: supplementary_material [file result_finite_k20.pdf › figures/result_finite_k20.pdf]
